# Supplementary material for: The Prognostic Significance of Pure Ground Glass Opacities in Lung Cancer Computed Tomographic Images
Source: PubMed Central journal article supplement (PMC6909955; doi:10.7150/jca.33132), 2019-11-17
Supplement: jcav10p6888s1.pdf [file jcav10p6888s1.pdf]

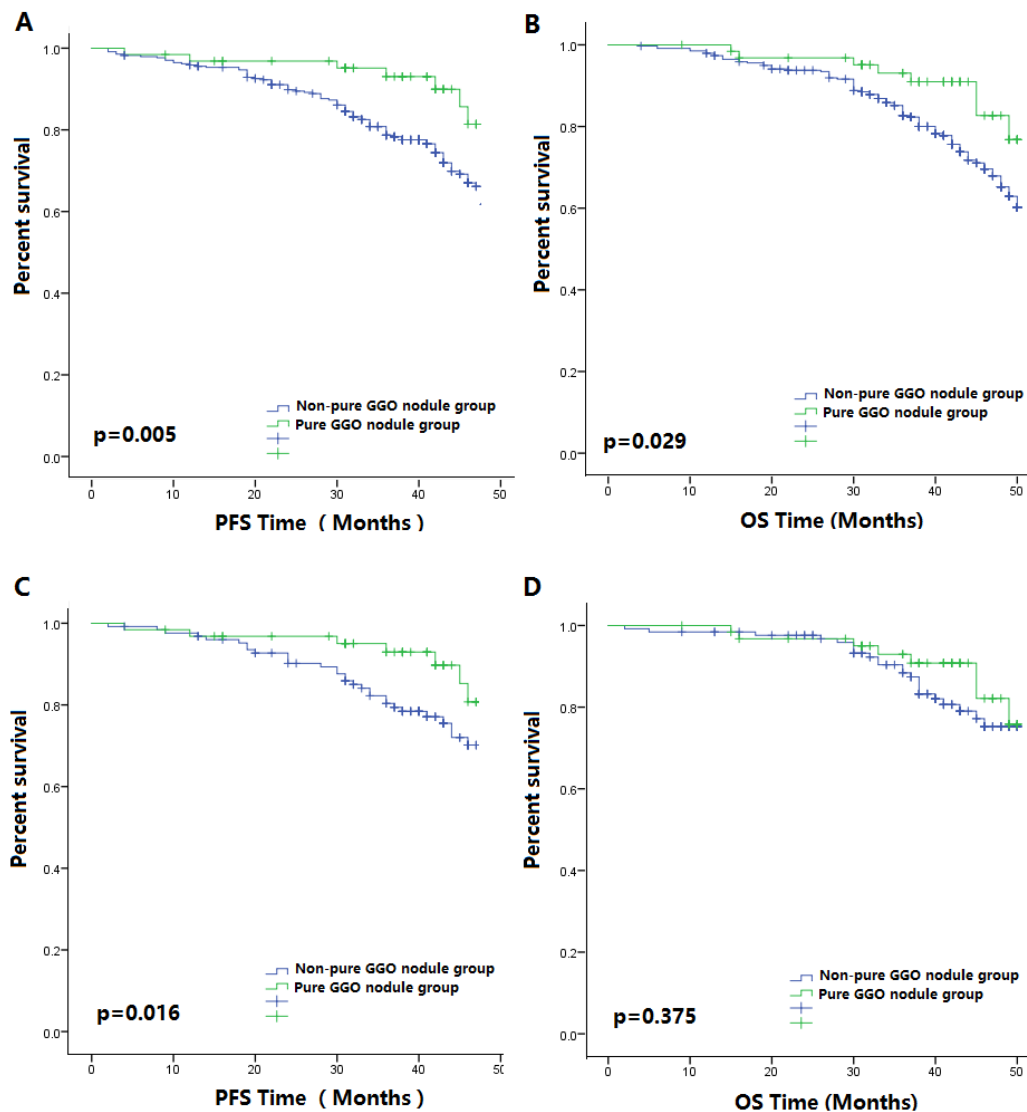

Supplementary Figure 1A. The Kaplan-Meier survival curve for PFS between 63 patients with pure GGO nodules and 341 patients with other lung cancer nodules after surgery (p-value = 0.005). B. The Kaplan-Meier survival curve for OS between 63 patients with pure GGO nodules and 341 patients with other lung cancer nodules after surgery (p-value = 0.029). C. The Kaplan-Meier survival curve for PFS between 63 patients with pure GGO nodules and 126 patients with matching tumor stages after surgery (p-value = 0.016). D. The Kaplan-Meier survival curve for OS between 63 patients with pure GGO nodules and 126 patients with matching tumor stages after surgery (p-value is 0.375).

**Supplementary Table 1. The association of pure GGO nodules with the clinicopathologic characteristics of 404 patients with lung cancer and treated with surgery.**

| Characteristic                      | Total, n=404 | Non-pure GGO<br>nodule, n=341 | Pure GGO<br>nodule, n=63 | p-value |
|-------------------------------------|--------------|-------------------------------|--------------------------|---------|
| <b>Gender, n (%)</b>                |              |                               |                          |         |
| Male                                | 261 (64.6)   | 232 (68.0)                    | 29 (46.0)                | 0.001   |
| Female                              | 143 (35.4)   | 109 (32.0)                    | 34 (54.0)                |         |
| <b>Age, years</b>                   |              |                               |                          |         |
| ≤60                                 | 224 (55.4)   | 190 (55.7)                    | 34 (54.0)                | 0.7197  |
| >60                                 | 180 (44.6)   | 151 (44.3)                    | 29 (46.0)                |         |
| <b>Histology, n (%)</b>             |              |                               |                          |         |
| Adenocarcinoma                      | 256 (63.4)   | 201 (58.9)                    | 55 (87.3)                | <0.001  |
| Squamous                            | 111 (27.5)   | 107 (31.4)                    | 4 (6.3)                  |         |
| SCLC                                | 12 (3.0)     | 11 (3.2)                      | 1 (1.6)                  |         |
| Other                               | 25 (6.1)     | 22 (6.5)                      | 3(4.8)                   |         |
| <b>Tumor size, n (%)</b>            |              |                               |                          |         |
| ≤3cm                                | 260 (63.4)   | 208 (61.0)                    | 52 (82.5)                | <0.001  |
| >3cm                                | 144 (35.6)   | 133 (39.0)                    | 11 (17.5)                |         |
| <b>Lymph node metastasis, n (%)</b> |              |                               |                          |         |
| No                                  | 268 (66.3)   | 219(64.2)                     | 49 (77.8)                | 0.036   |
| Yes                                 | 136 (33.7)   | 122(35.8)                     | 14 (22.2)                |         |
| <b>Pathological stage, n (%)</b>    |              |                               |                          |         |
| I                                   | 225 (55.7)   | 179 (52.5)                    | 46 (73.0)                | 0.003   |
| II                                  | 96 (23.8)    | 89 (26.1)                     | 7 (11.1)                 |         |
| III                                 | 83 (20.5)    | 73 (21.4)                     | 10 (15.9)                |         |

SD standard deviation; SCLC small cell lung cancer; GGO ground glass opacity

**Supplementary Table 2. The association of pure GGO nodules with the clinicopathologic characteristics of 189 patients with individual-matching according to tumor stage.**

| Characteristic                      | Total, n=189 | Non-pure GGO nodule, n=126 | Pure GGO nodule, n=63 | p-value |
|-------------------------------------|--------------|----------------------------|-----------------------|---------|
| <b>Gender, n (%)</b>                |              |                            |                       |         |
| Male                                | 86 (45.5)    | 57 (45.2)                  | 29 (46.0)             | 0.918   |
| Female                              | 103 (54.5)   | 69 (54.8)                  | 34 (54.0)             |         |
| <b>Age, years</b>                   |              |                            |                       |         |
| ≤60                                 | 106 (56.0)   | 72 (57.1)                  | 34 (54.0)             | 0.678   |
| >60                                 | 83 (44.0)    | 54(42.9)                   | 29 (46.0)             |         |
| <b>Histology, n (%)</b>             |              |                            |                       |         |
| Adenocarcinoma                      | 165(87.3)    | 110 (87.3)                 | 55 (87.3)             | 1.000   |
| Squamous                            | 12(6.3)      | 8(6.3)                     | 4 (6.3)               |         |
| SCLC                                | 3 (1.6)      | 3 (2.3)                    | 1 (1.6)               |         |
| Other                               | 9 (4.8)      | 5 (4.0)                    | 3(4.8)                |         |
| <b>Tumor size, n (%)</b>            |              |                            |                       |         |
| ≤3cm                                | 147 (77.8)   | 95 (75.4)                  | 52 (82.5)             | 0.266   |
| >3cm                                | 42 (22.2)    | 31 (24.6)                  | 11 (17.5)             |         |
| <b>Lymph node metastasis, n (%)</b> |              |                            |                       |         |
| No                                  | 133 (70.4)   | 84 (66.7)                  | 49 (77.8)             | 0.115   |
| Yes                                 | 56 (29.6)    | 42 (33.3)                  | 14 (22.2)             |         |
| <b>Pathological stage, n (%)</b>    |              |                            |                       |         |
| I                                   | 138 (73.0)   | 92(73.0)                   | 46 (73.0)             | 1.000   |
| II                                  | 21 (11.1)    | 14 (11.1)                  | 7 (11.1)              |         |
| III                                 | 30 (15.9)    | 20 (15.9)                  | 10 (15.9)             |         |

SD standard deviation; SCLC small cell lung cancer; GGO ground glass opacity
